# Supplementary material for: A versatile strategy for the synthesis and mechanical property manipulation of networked biodegradable polymeric materials composed of well-defined alternating hard and soft domains
Source: Royal Society of Chemistry journal article supplement (doi:10.1039/c9ra00255c), 2019-01-01
Supplement: c9ra00255c1.pdf [file c9ra00255c1.pdf]

## Supplementary Information

# A Versatile Strategy for Synthesis and Mechanical Property Manipulation of Networked Biodegradable Polymeric Materials Composed of Well-Defined Alternating Hard and Soft Domains

*Hideto Tsuji,\* Ken-Ichi Tamura, and Yuki Arakawa*

*Department of Environmental and Life Sciences, Graduate School of Engineering,  
Toyohashi University of Technology, Tempaku-cho, Toyohashi, Aichi 441-8580, Japan  
E-mail: [tsuji@ens.tut.ac.jp](mailto:tsuji@ens.tut.ac.jp)*

### Contents

- S1. Typical <sup>1</sup>H NMR spectrum of 4-C-L copolymer (4-C49-L38) (Figure S1)**
- S2. Typical GPC curves of 4-C and 4-C-L polymers (before and after 2<sup>nd</sup> step polymerization, 4-C49 and 4-C49-L38, respectively) (Figure S2)**
- S3. Degree of crosslinking and crystallinity of samples (Table S1)**
- S4. WAXD Profile of 4-C49-L38 sample prepared by solvent evaporation (Figure S3)**
- S5. DSC heating and cooling thermograms of 4-C49-L38 sample prepared by solvent evaporation (before crosslinking) (Figure S4)**
- S5. Thermal properties of samples (Table S2)**
- S6. Enthalpies of cold crystallization and melting of samples before and after crosslinking for heating scanning (Figure S5)**
- S7. Enthalpies of crystallization of samples before and after crosslinking for cooling scanning**

(Figure S6)

S8. Relative crystallinity ( $X_r$ ) of samples before and after crosslinking for cooling scanning

(Figure S7)

S1. Typical  $^1\text{H}$  NMR spectrum of 4-C-L copolymer (4-C49-L38) (Figure S1)

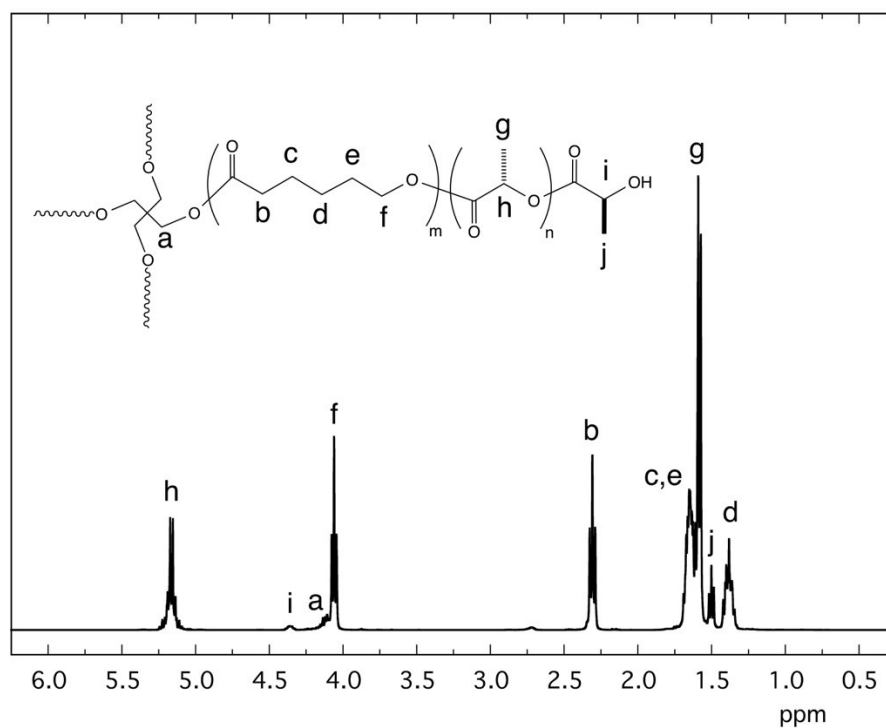

**Figure S1.** Typical  $^1\text{H}$  NMR spectrum of 4-C-L copolymer (4-C49-L38).

**S2. Typical GPC curves of 4-C and 4-C-L polymers (before and after 2<sup>nd</sup> step polymerization, 4-C49 and 4-C49-L38, respectively) (Figure S2)**

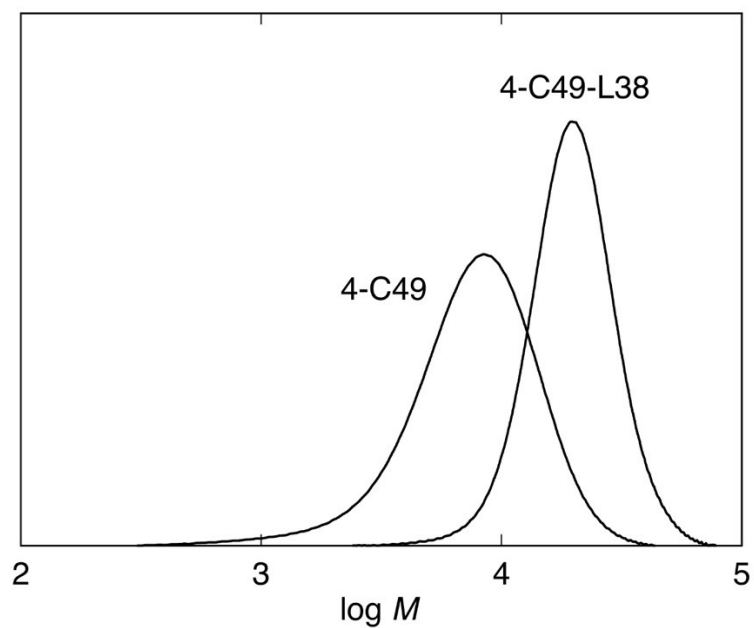

**Figure S2.** Typical GPC curves of 4-C and 4-C-L polymers (before and after 2<sup>nd</sup> step polymerization, 4-C49 and 4-C49-L38, respectively).

### S3. Degree of crosslinking and crystallinity of samples (Table S1)

| Code                         | DC <sup>a)</sup><br>(%) | $X_c(\text{PCL})^b$<br>(%) | $X_c(\text{PLLA})^b$<br>(%) | $X_c(\text{tot})^c$<br>(%) |
|------------------------------|-------------------------|----------------------------|-----------------------------|----------------------------|
| 4-L90                        |                         | 0.0                        | 48.9                        | 48.9                       |
| 4-C28-L62                    |                         | 0.0                        | 44.5                        | 44.5                       |
| 4-C49-L38                    |                         | 4.4                        | 28.5                        | 32.9                       |
| 4-C49-L38 (SE) <sup>d)</sup> |                         | 5.8                        | 30.1                        | 35.9                       |
| 4-C69-L28                    |                         | 31.8                       | 0.0                         | 31.8                       |
| 4-C93                        |                         | 58.5                       | 0.0                         | 58.5                       |
| 4-L90/4-C93                  |                         | 35.1                       | 1.6                         | 36.7                       |
| N4-L90                       | 99.6                    | 0.0                        | 0.0                         | 0.0                        |
| N4-C28-L62                   | 97.0                    | 0.0                        | 0.0                         | 0.0                        |
| N4-C49-L38                   | 93.9                    | 0.0                        | 0.0                         | 0.0                        |
| N4-C69-L28                   | 98.1                    | 7.5                        | 0.0                         | 7.5                        |
| N4-C93                       | 94.0                    | 35.7                       | 0.0                         | 35.7                       |
| N4-L90/4-C93                 | 73.6                    | 13.4                       | 0.0                         | 13.4                       |

**Table S1.** Crystallinity ( $X_c$ ) of samples.

<sup>a)</sup> Degree of crosslinking.

<sup>b)</sup>  $X_c(\text{PCL})$  and  $X_c(\text{PLLA})$  are crystallinities of PCL and PLLA, respectively.

<sup>c)</sup>  $X_c(\text{tot}) = X_c(\text{PCL}) + X_c(\text{PLLA})$

<sup>d)</sup> The sample was prepared by solvent evaporation, which is different from other copolymer samples prepared by precipitation but identical with the 4-L90/4-C93 blend sample.

#### S4. WAXD Profile of 4-C49-L38 sample prepared by solvent evaporation (Figure S3)

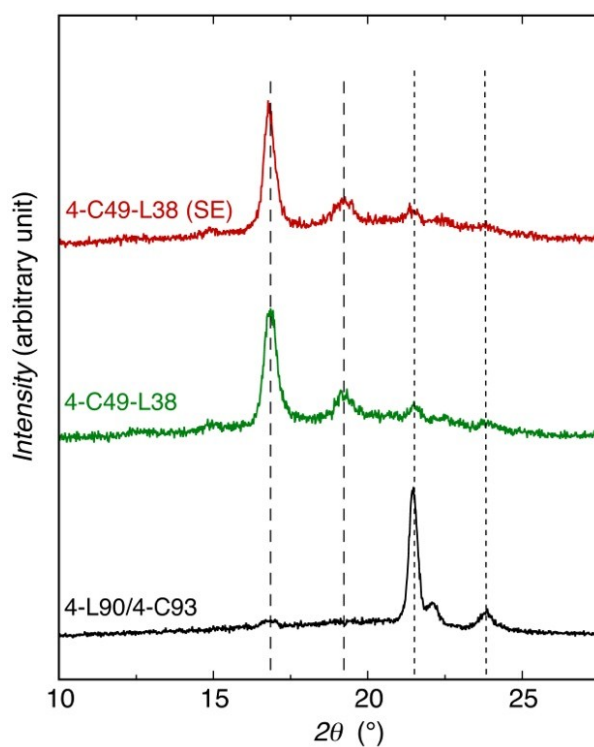

**Figure S3.** WAXD profile of 4-C49-L38 sample prepared by solvent evaporation (before crosslinking) [abbreviated as 4-C49-L38 (SE)], together with 4-C49-L38 sample prepared by precipitation and 4-L90/4-C93 blend sample prepared by solvent evaporation. The dashed and dotted lines indicate the main crystalline peak angles of PLLA  $\alpha$ -(or  $\delta$ -)form and PCL crystallites, respectively.

## S5. Thermal properties of samples (Table S2)

| Code                         | Heating            |                       |                                |                                 |                                              |                                                       |                                                        |                                                     | Cooling            |                                                       |                                                        |                                                       |
|------------------------------|--------------------|-----------------------|--------------------------------|---------------------------------|----------------------------------------------|-------------------------------------------------------|--------------------------------------------------------|-----------------------------------------------------|--------------------|-------------------------------------------------------|--------------------------------------------------------|-------------------------------------------------------|
|                              | $T_g^{a)}$<br>(°C) | $T_{cc}^{a)}$<br>(°C) | $T_m(\text{PCL})^{a)}$<br>(°C) | $T_m(\text{PLLA})^{a)}$<br>(°C) | $\Delta H_{cc}^{b)}$<br>(J g <sup>-1</sup> ) | $\Delta H_m(\text{PCL})^{b)}$<br>(J g <sup>-1</sup> ) | $\Delta H_m(\text{PLLA})^{b)}$<br>(J g <sup>-1</sup> ) | $\Delta H(\text{tot})^{b)}$<br>(J g <sup>-1</sup> ) | $T_c^{d)}$<br>(°C) | $\Delta H_c(\text{PCL})^{c)}$<br>(J g <sup>-1</sup> ) | $\Delta H_c(\text{PLLA})^{c)}$<br>(J g <sup>-1</sup> ) | $\Delta H_c(\text{tot})^{c)}$<br>(J g <sup>-1</sup> ) |
| 4-L90                        | 54.6               | 100.3                 |                                | 146.0                           | -0.5                                         |                                                       | 32.6                                                   | 32.0                                                |                    |                                                       |                                                        |                                                       |
| 4-C28-L62                    |                    |                       |                                | 143.6                           |                                              |                                                       | 24.8                                                   | 24.8                                                | 86.6               |                                                       | -18.9                                                  | -18.9                                                 |
| 4-C49-L38                    |                    |                       | 44.6                           | 120.0                           |                                              | 5.7                                                   | 21.6                                                   | 27.3                                                | 72.0               |                                                       | -16.1                                                  | -16.1                                                 |
| 4-C49-L38 (SE) <sup>d)</sup> |                    |                       | 36.1, 43.5                     | 119.3                           |                                              | 5.7                                                   | 20.4                                                   | 26.1                                                | 70.5               |                                                       | -17.8                                                  | -17.8                                                 |
| 4-C69-L28                    |                    |                       | 22.4, 50.1                     |                                 |                                              | 60.1                                                  |                                                        | 60.1                                                | 19.8               | -41.7                                                 |                                                        | -41.7                                                 |
| 4-C93                        |                    |                       | 61.6                           |                                 |                                              | 90.0                                                  |                                                        | 90.0                                                | 34.2               | -60.8                                                 |                                                        | -60.8                                                 |
| 4-L90/4-C93                  |                    | 99.6                  | 54.8                           | 132.7, 142.6                    | -5.4                                         | 56.0                                                  | 14.9                                                   | 65.5                                                | 32.6               | -39.4                                                 |                                                        | -39.4                                                 |
| N4-L90                       | 60.7               |                       |                                |                                 |                                              |                                                       |                                                        |                                                     |                    |                                                       |                                                        |                                                       |
| N4-C28-L62                   | 32.2               |                       |                                |                                 |                                              |                                                       |                                                        |                                                     |                    |                                                       |                                                        |                                                       |
| N4-C49-L38                   |                    |                       |                                |                                 |                                              |                                                       |                                                        |                                                     |                    |                                                       |                                                        |                                                       |
| N4-C69-L28                   |                    |                       | 24.7, 34.5                     |                                 |                                              | 2.7                                                   |                                                        | 2.7                                                 |                    |                                                       |                                                        |                                                       |
| N4-C93                       |                    |                       | 47.4                           |                                 |                                              | 46.5                                                  |                                                        | 46.5                                                | 19.1               | -39.6                                                 |                                                        | -39.6                                                 |
| N4-L90/4-C93                 | 57.9               |                       | 41.9                           | 142.9                           | -1.9                                         | 29.7                                                  | 2.6                                                    | 30.4                                                | 9.6                | -24.6                                                 |                                                        | -24.6                                                 |

**Table S2.** Thermal properties of samples.

<sup>a)</sup>  $T_g$ ,  $T_{cc}$ , and  $T_m(\text{PCL})$ , and  $T_m(\text{PLLA})$  are glass transition and cold crystallization temperatures, and melting temperatures of PCL and PLLA, respectively.

<sup>b)</sup>  $\Delta H_{cc}$  and  $\Delta H_m(\text{PCL})$  and  $\Delta H_m(\text{PLLA})$  are enthalpies of cold crystallization and melting of PCL and PLLA, respectively.  $\Delta H(\text{tot}) = \Delta H_{cc} + \Delta H_m(\text{PCL}) + \Delta H_m(\text{PLLA})$ .

<sup>c)</sup>  $T_c$ ,  $\Delta H_c(\text{PCL})$  and  $\Delta H_c(\text{PLLA})$  are crystallization temperature and crystallization enthalpies of PCL and PLLA, respectively.  $\Delta H(\text{tot}) = \Delta H_c(\text{PCL}) + \Delta H_c(\text{PLLA})$ .

<sup>d)</sup> The sample was prepared by solvent evaporation, which is different from other copolymer samples prepared by precipitation but identical with the 4-L90/4-C93 blend sample.

**S6. DSC heating (a) and cooling (b) thermograms of 4-C49-L38 sample prepared by solvent evaporation (before crosslinking) (Figure S4)**

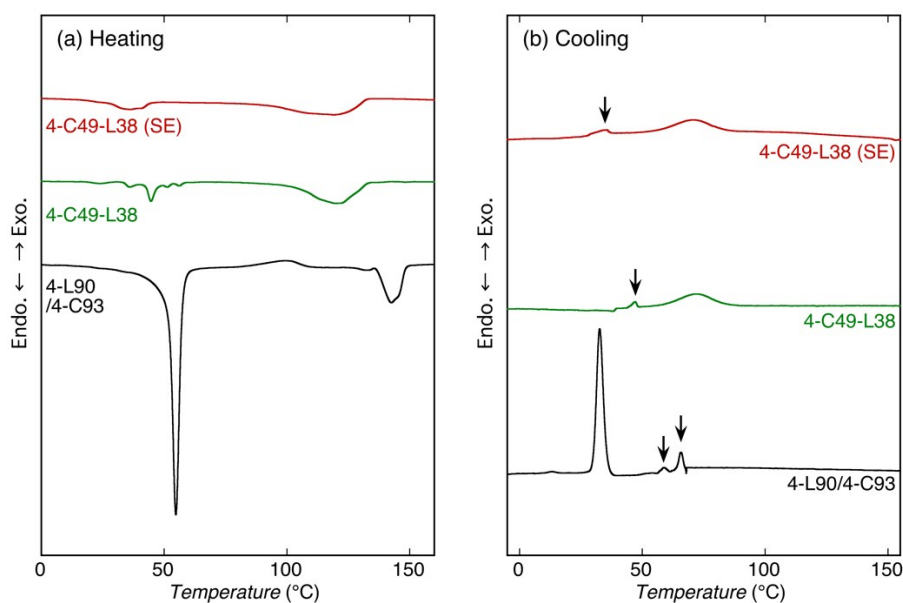

**Figure S4.** DSC heating (a) and cooling (b) thermograms of 4-C49-L38 sample prepared by solvent evaporation (before crosslinking) [abbreviated as 4-C49-L38 (SE)], together with 4-C49-L38 sample prepared by precipitation and 4-L90/4-C93 blend sample prepared by solvent evaporation. The exothermic peaks with arrows were formed due to replenishment of liquid nitrogen to the DSC apparatus.

**S7. Enthalpies of cold crystallization and melting of samples before and after crosslinking for heating scanning (Figure S5)**

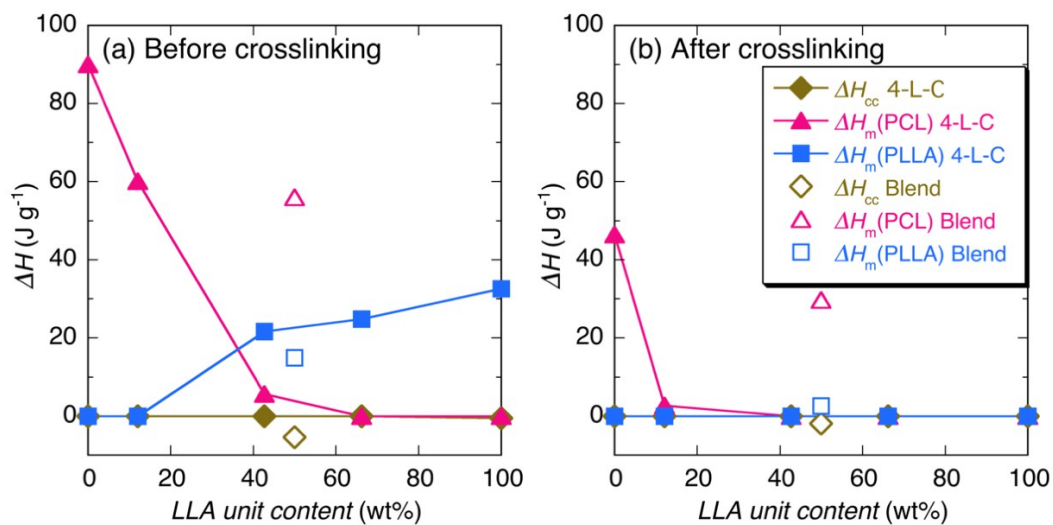

**Figur**

**e S5.** Enthalpies of cold crystallization and melting of samples before (a) and after (b) crosslinking for heating scanning.

## S8. Enthalpies of crystallization of samples before and after crosslinking for cooling scanning

(Figure S6)

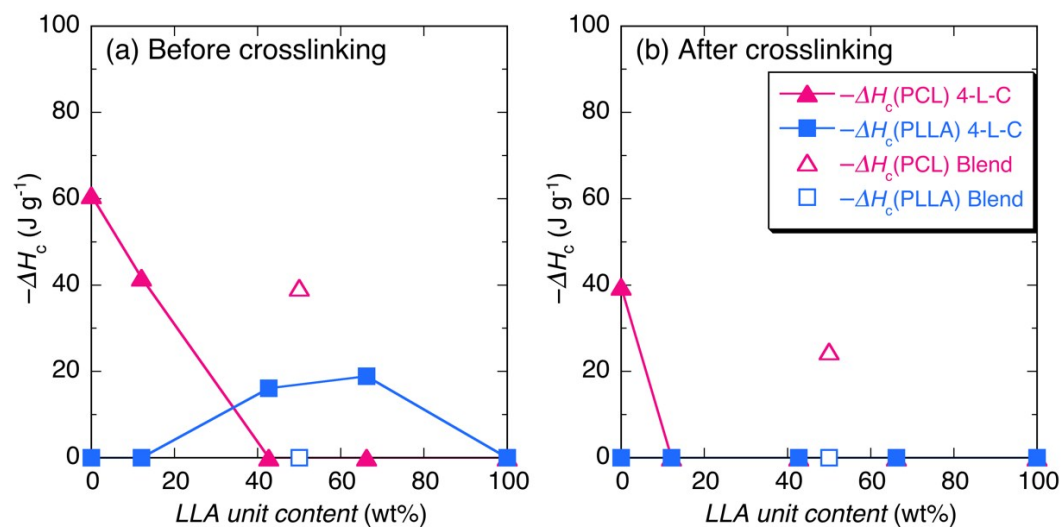

**Figure S6.** Enthalpies of crystallization and melting of samples before (a) and after (b) crosslinking for cooling scanning.

# **S9. Relative crystallinity ( $X_r$ ) of samples before and after crosslinking for cooling scanning**

**(Figure S7)**

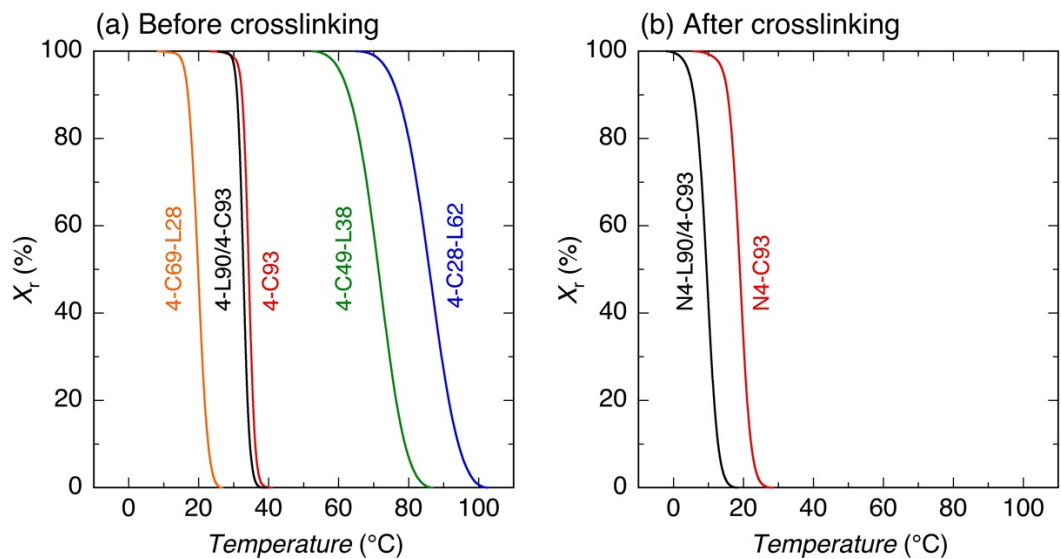

**Figur**

**e S7.** Relative crystallinity ( $X_r$ ) of samples before (a) and after (b) crosslinking for cooling scanning as a function of temperature.
